# Supplementary material for: Hippo pathway deletion in adult resting cardiac fibroblasts initiates a cell state transition with spontaneous and self-sustaining fibrosis
Source: PubMed Central journal article supplement — Genes Dev. 2019 Nov 1;33(21-22):1491–505. doi: 10.1101/gad.329763.119 (PMC6824468; doi:10.1101/gad.329763.119), 2019-11-01
Supplement: supp_gad.329763.119_Supplemental_Figures_.pdf [file supp_gad.329763.119_Supplemental_Figures_.pdf]

Supplementary Materials

Xiao and Hill et al.

Supplementary Figure 1

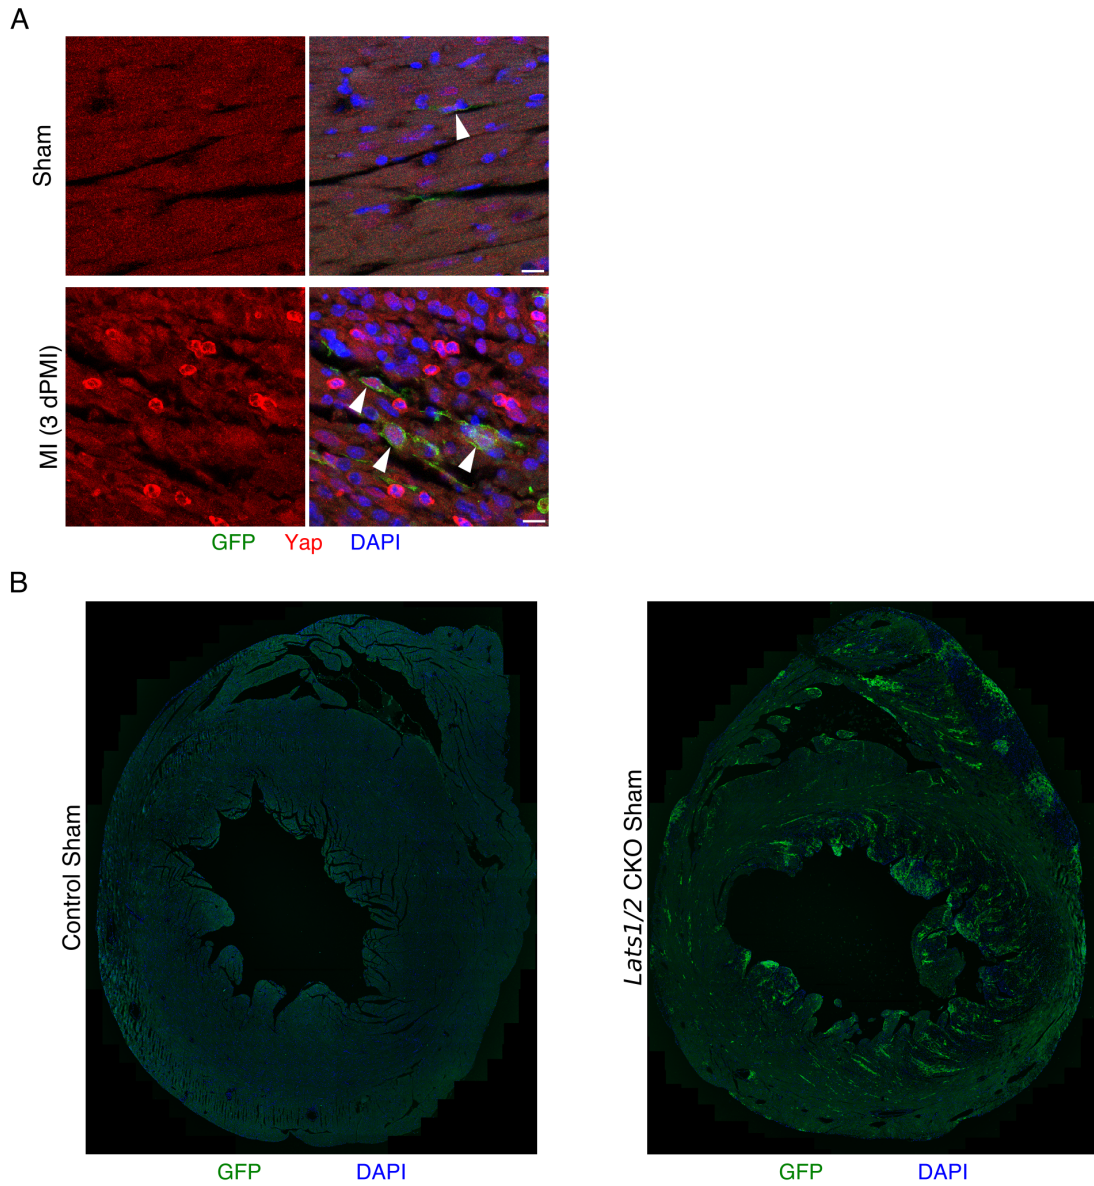

**Figure S1. Yap is Activated Following Myocardial Infarction, related to Figure 1.**

A. Representative images from cardiac tissue sections after MI or sham operations stained for GFP (green), Yap (red), and DAPI (blue). Cardiac fibroblasts (GFP,

arrowheads) showed increased nuclear Yap activity at 3 dPMI compared with sham cardiac fibroblasts. Scale bar indicates 25  $\mu\text{m}$ .

B. Representative tiled images from uninjured cardiac tissue sections stained for GFP (green), and DAPI (blue).

# Supplementary Figure 2

A

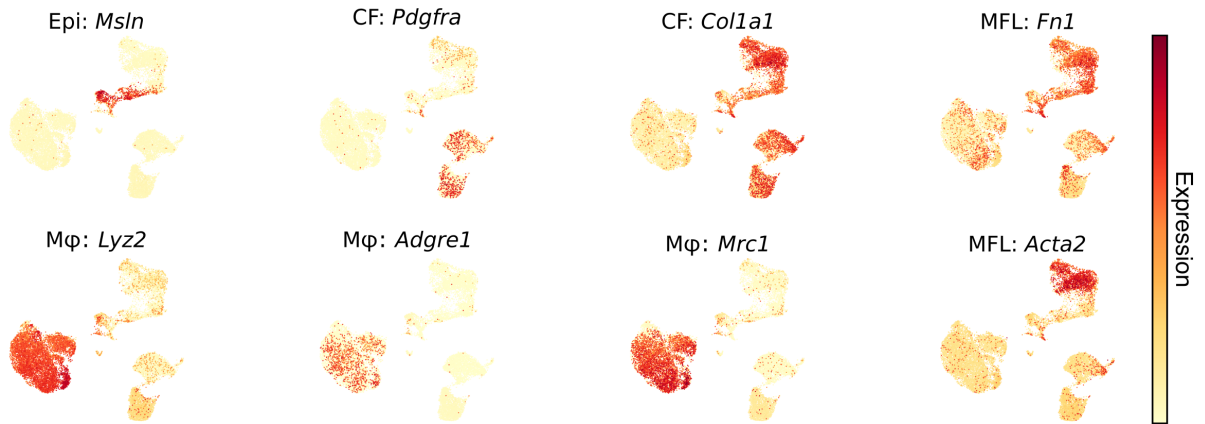

B

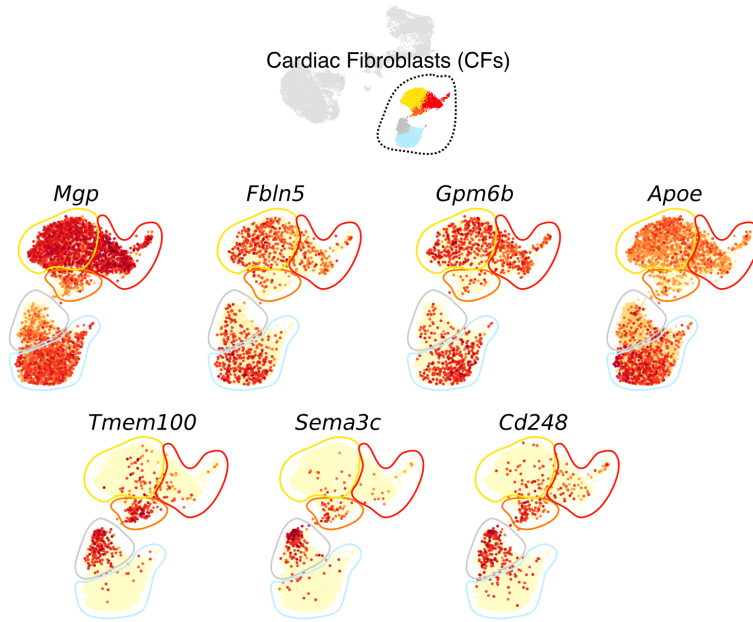

C

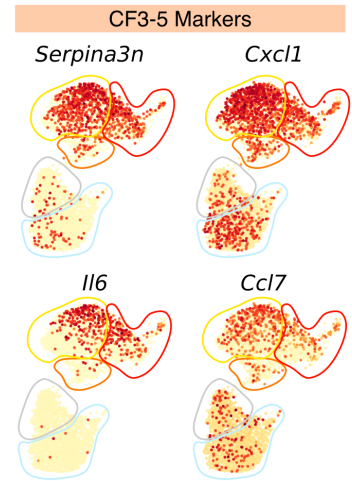

D

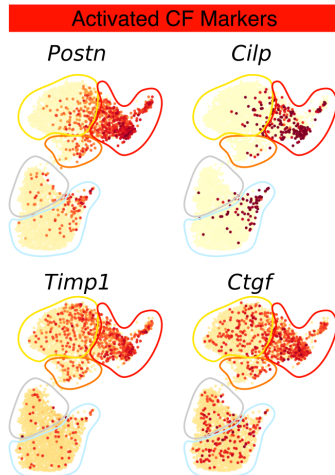

E

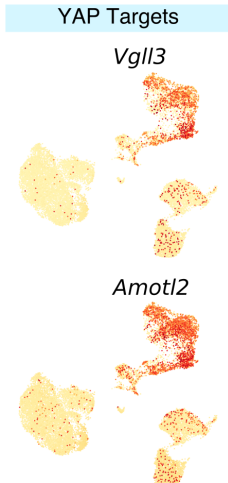

F

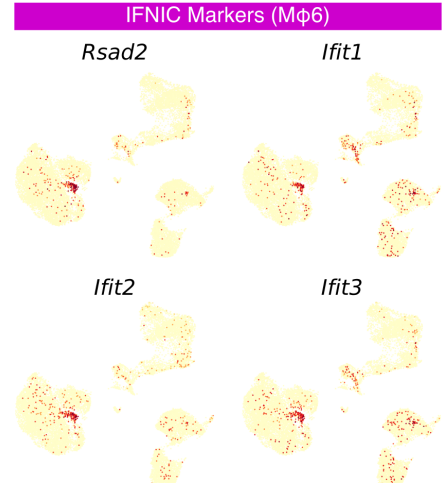

**Figure S2. Single-cell RNA-seq Reveals that Hippo Signaling Inhibits the Non-Autonomous Activation of Cardiac Fibroblasts and Myeloid Cells, Related to Figure 2.**

- A. Feature plot of selected signature gene expression in major cell clusters. High expression shown in red, and cells not expressing gene are tan. UMAP plot originally shown in **Figure 2A**.
- B. Feature plot of cardiac fibroblast cluster markers. Fibroblast clusters were extracted from full data set shown in **Figure 2A** for detailed gene profiling. Cell clusters are outlined in same colors shown in **Figure 2A**.
- C. Feature plots of cardiac fibroblast markers enriched in non-mutant cardiac fibroblasts derived from *Lats1/2* CKO hearts.
- D. Feature plots of cardiac fibroblast markers enriched in activated cardiac fibroblasts (non-mutant) derived from *Lats1/2* CKO hearts.
- E. Feature plots of canonical Yap target genes.
- F. Feature plots of IFNIC markers.

### Supplementary Figure 3

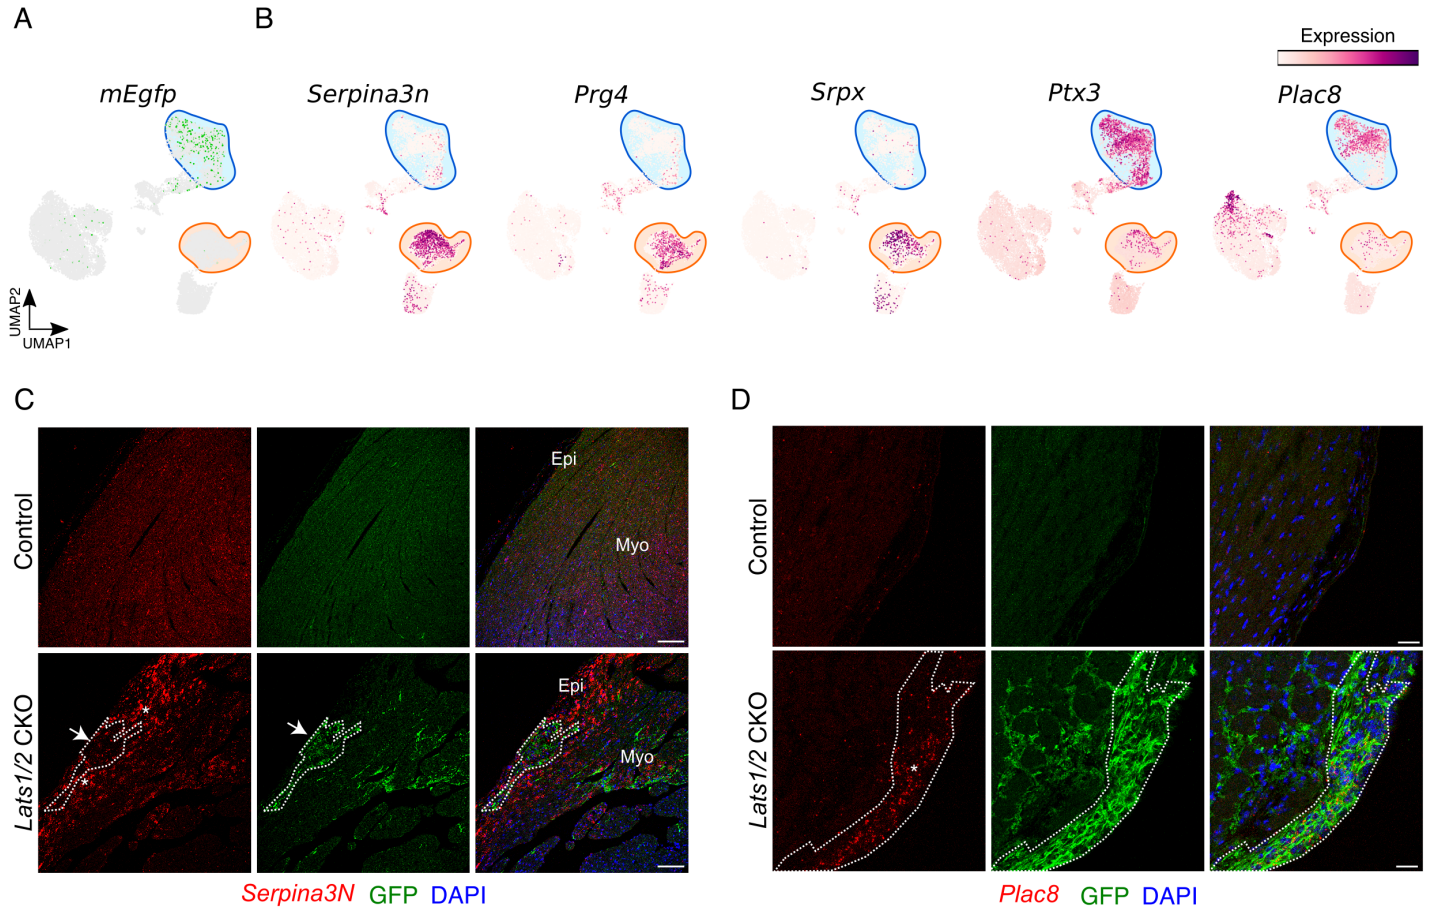

**Figure S3. Yap is a Cell-Nonautonomous Regulator of Cardiac Fibroblasts, Related to Figure 3.**

- A. Feature plots showing expression of *mEgfp*.
- B. Feature plots showing expression of marker genes. MFL clusters are highlighted in blue, and CF3-5 clusters are highlighted in orange.
- C. Representative *in situ* hybridization image of *Serpina3N* (red). Cardiac fibroblasts were lineage traced (green). Nuclei were stained with DAPI (blue). Epi, epicardium; Myo, myocardium. Scale bar, 100  $\mu$ m.

D. Representative *in situ* hybridization image of *Plac8* (red). Cardiac fibroblasts were lineage traced (green). Nuclei were stained with DAPI (blue). Epi, epicardium; Myo, myocardium. Scale bar, 25  $\mu$ m.

## Supplementary Figure 4

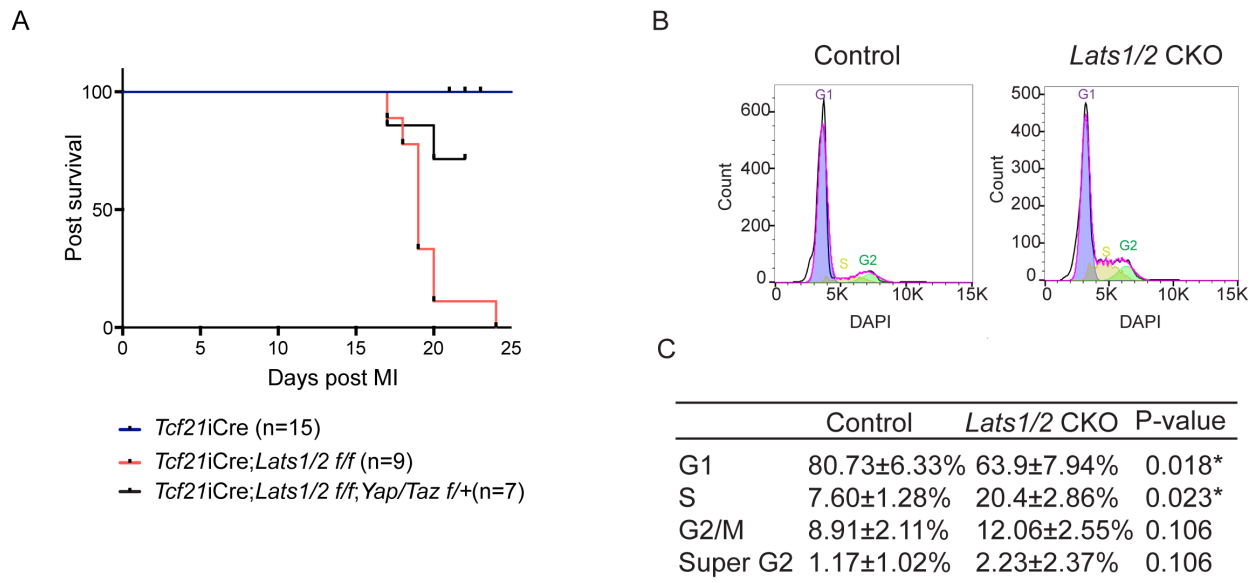

### Figure S4. $Lats1/2$ Suppress Cardiac Fibroblast Proliferation, Related to Figure 5.

- A. Survival curve of control mice ( $Tcf21^{iCre/+}; Rosa26^{mTmG/+}$ )  $Lats1/2$  CKO ( $Tcf21^{iCre/+}; Lats1/2^{flox/flox}; Rosa26^{mTmG/+}$ ), and  $Tcf21^{iCre/+}; Lats1/2^{flox/flox}; Yap/Taz^{flox/+}$  mice after myocardial infarction.
- B. DNA content and ploidy of cardiac fibroblasts after myocardial infarction. Representative histograms from flow cytometry analysis of isolated cardiac nuclei from control and  $Lats1/2$  CKO hearts, stained with DAPI.
- C. Quantification of cardiac fibroblast proliferation after myocardial infarction. Statistical significance was determined by Chi-square test.

## Supplementary Figure 5

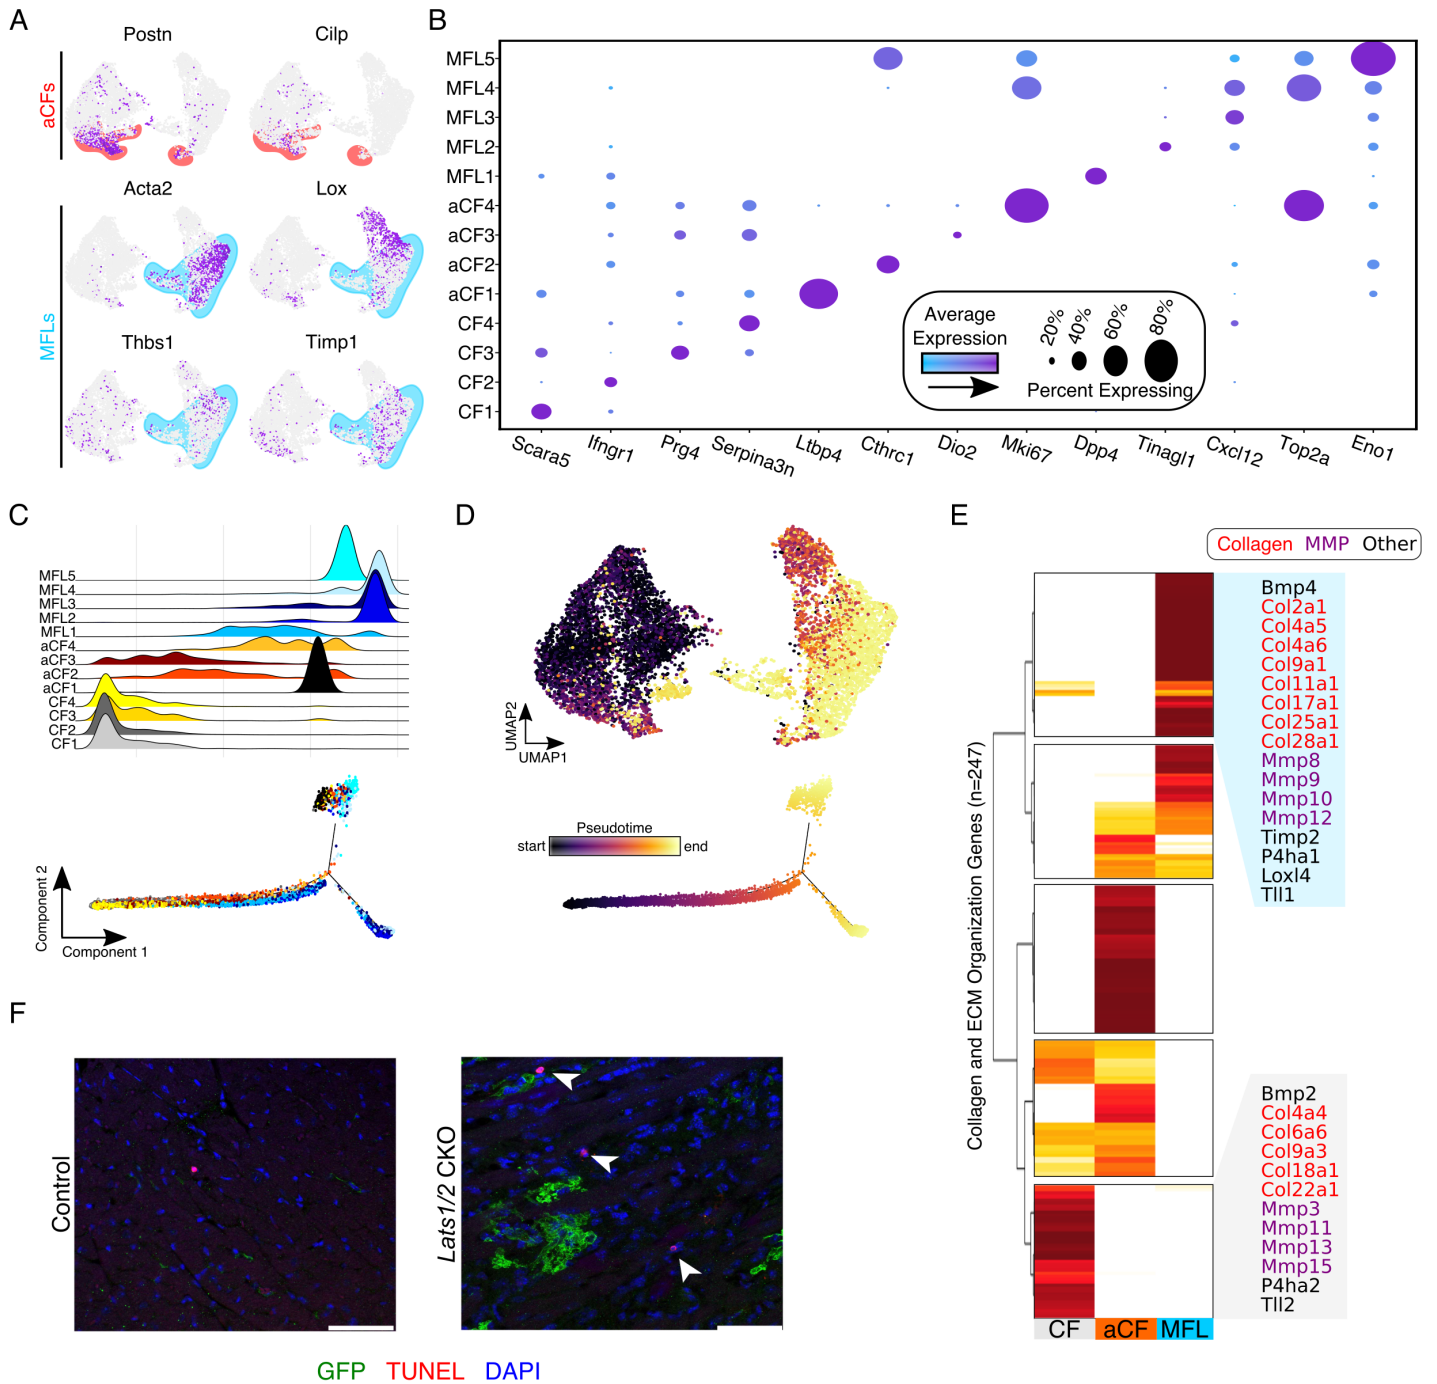



- A. Feature plots of markers for active fibroblasts (top), and myofibroblasts (bottom). Clusters position in UMAP from **Figure 6A** is shown in colored outlines.
- B. Dot plot of marker gene expression for each cardiac fibroblast cluster. Size of dot indicates percentage of cells within a cluster that express a given gene.
- C. UMAP plot of cardiac fibroblast single-cell transcriptome experimental identities.
- D. Pseudotemporal ordering of cardiac fibroblasts. Top, density plot of cluster compositions across pseudotime. Bottom, ordering of cardiac fibroblasts along a minimum spanning tree (MST). Colored by cell cluster according to **Figure 6A**.
- E. Heatmap showing the expression of collagen formation and extracellular matrix organization genes across merged single cell clusters.
- F. High magnification image of TUNEL (red) stained cardiac tissue from uninjured control and *Lats1/2* CKO hearts shown in Figure 7L. Lineage traced cardiac fibroblasts are GFP labelled (green). Nuclei stained with DAPI (blue). Scale bar indicates 25  $\mu\text{m}$ .

Supplementary Figure 6

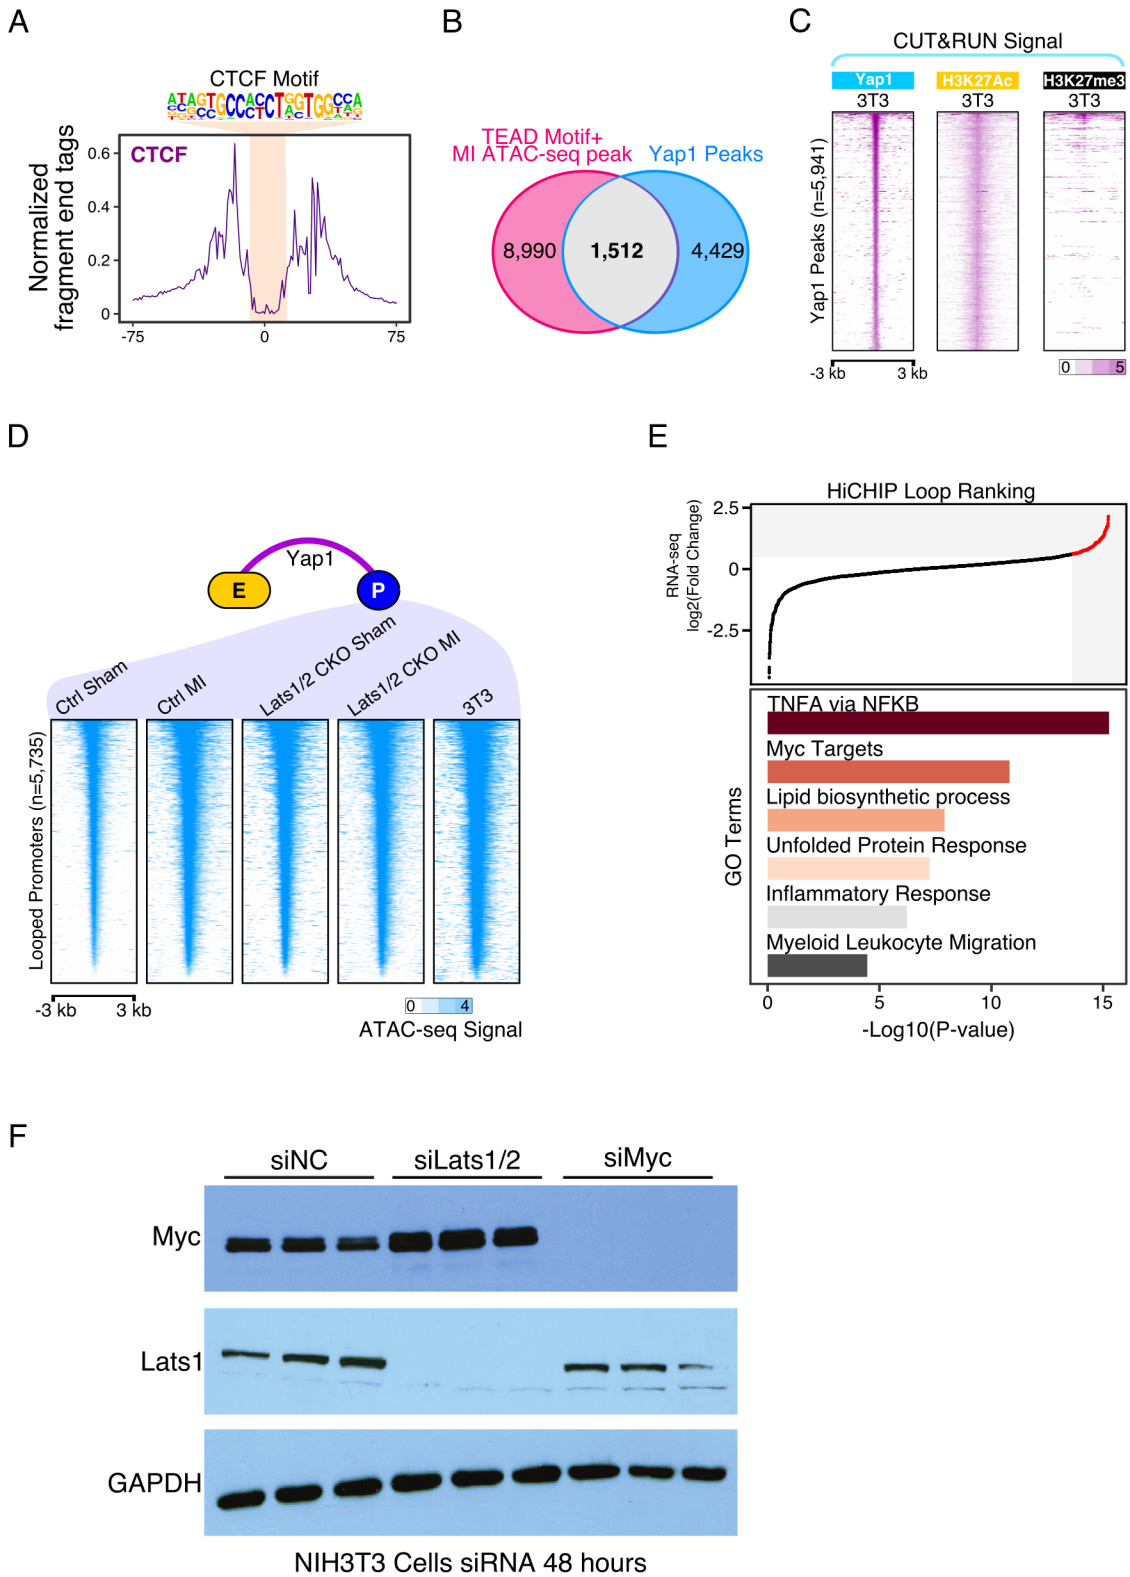

**Figure S6. Genome-Wide Myofibroblast Yap Chromatin Occupancy Mapping via CUT&RUN, Related to Figure 7.**

- A. CUT&RUN footprint analysis for CTCF.
- B. Venn diagram showing overlay of TEAD motif containing Fast-ATAC peaks from control cardiac fibroblasts 3 dPMI, and myofibroblast Yap CUT&RUN peaks.
- C. Heatmap showing CUT&RUN signal (read depth) across all myofibroblast Yap peaks for indicated histone marks and Yap.
- D. Heatmap showing Fast-ATAC signal (read depth) across all Yap-associated and topologically looped promoters. Promoters (n=8,101) were identified in Fig. 2E, as being looped to enhancers. Top, schematic of enhancer-promoter H3K27Ac HiChIP loop interaction for Yap1 occupied anchors.
- E. Top, ranking of Yap-mediated H3K27Ac loops by expression in CFs after MI. Red color indicates loops to genes with expression greater than  $\log_2$  (fold-change) 0.5 compared to sham. Bottom, gene ontology analysis of highlighted looped promoters.
- F. Western blot showing MYC, LATS1, and GAPDH expression in NIH3T3 myofibroblasts 48 hours after siRNA treatment with either control siNC, siLats1/2, or siMyc.

Supplementary Figure 7

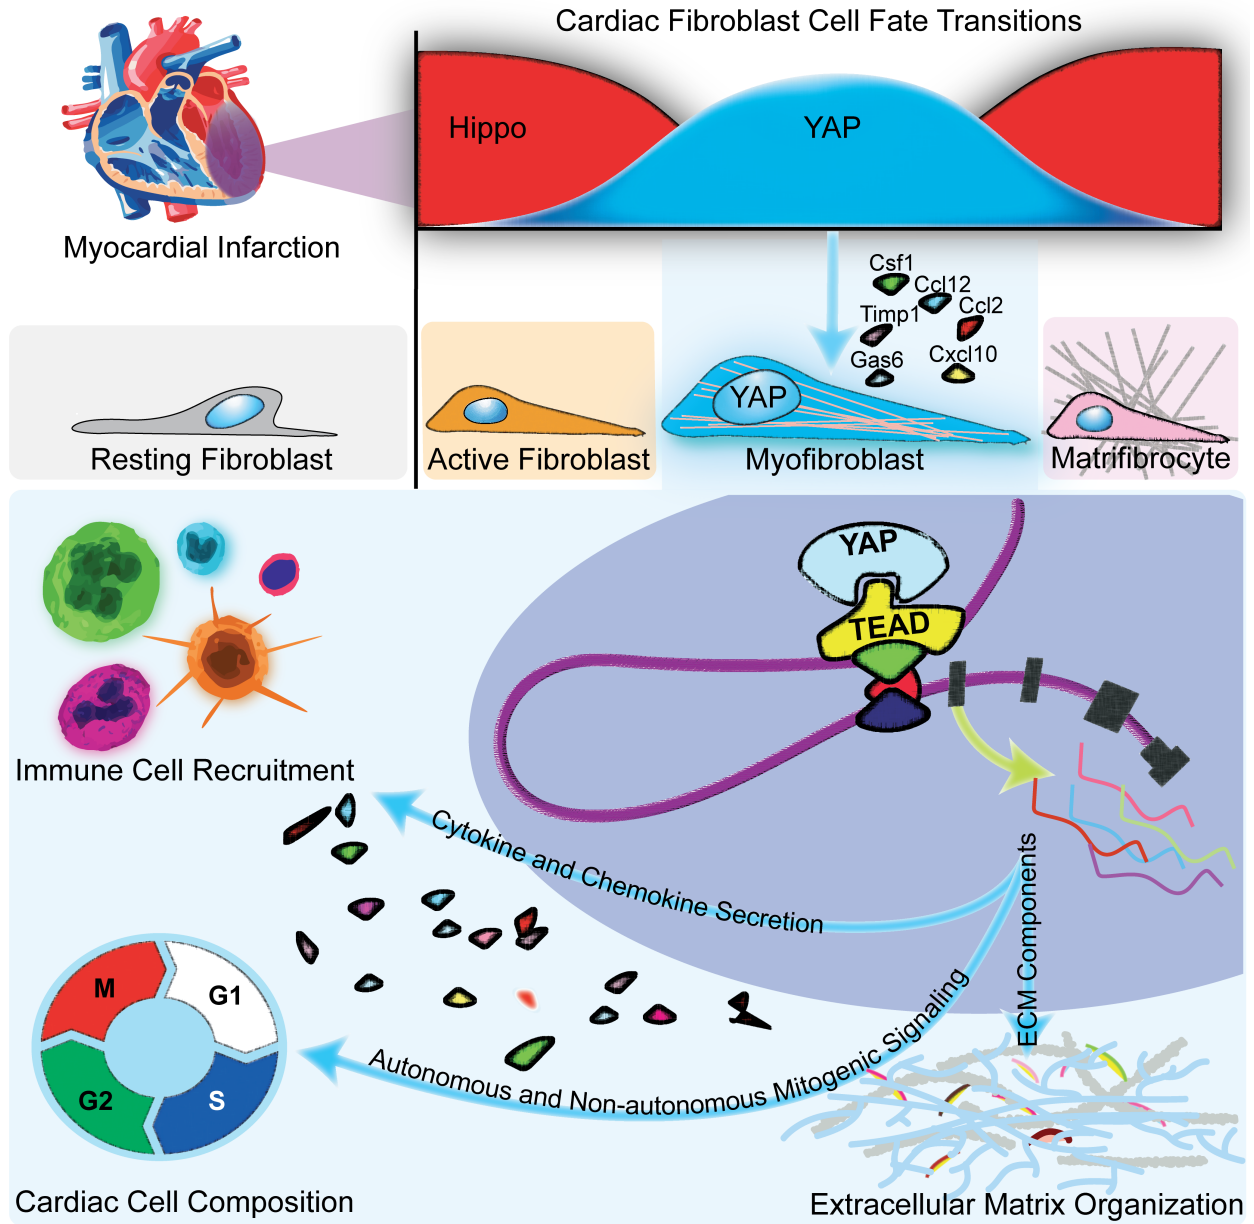

**Figure S7. Model of Lats Kinase Regulation of Cardiac Fibroblast Cell Fate Transitions and the Pro-Inflammatory Yap Gene Regulatory Network.**
